# Supplementary material
Source: PubMed Central journal article supplement (PMC7642668)
Supplement: ajcr0010-3267-f7.pdf [file ajcr0010-3267-f7.pdf]

## Preclinical evaluation of PRC2-targeting agents in NPC

**Table S1.** Patient characteristics

| Characteristics                | No. of patients | %    |
|--------------------------------|-----------------|------|
| Total number of patients       | 93              |      |
| Age                            |                 |      |
| ≤ 50                           | 48              | 51.6 |
| > 50                           | 45              | 48.4 |
| Gender                         |                 |      |
| Males                          | 74              | 79.6 |
| Females                        | 19              | 20.4 |
| Primary tumor (T) stage        |                 |      |
| T1                             | 18              | 19.4 |
| T2                             | 28              | 30.1 |
| T3                             | 31              | 33.3 |
| T4                             | 15              | 16.1 |
| Unknown                        | 1               | 1.1  |
| Regional lymph nodes (N) stage |                 |      |
| N0                             | 21              | 22.6 |
| N1                             | 34              | 36.6 |
| N2                             | 24              | 25.8 |
| N3                             | 13              | 14.0 |
| Unknown                        | 1               | 1.1  |
| Metastatic disease             |                 |      |
| M0                             | 87              | 93.6 |
| M1                             | 6               | 6.5  |
| Overall stage                  |                 |      |
| Stage I                        | 2               | 2.2  |
| Stage II                       | 26              | 28.0 |
| Stage III                      | 40              | 43.0 |
| Stage IVA                      | 18              | 19.4 |
| Stage IVB                      | 4               | 4.3  |
| Stage IVC                      | 1               | 1.1  |
| Unknown                        | 2               | 2.2  |
| Prior Chemotherapy             |                 |      |
| No                             | 10              | 10.8 |
| Yes                            | 47              | 50.5 |
| Unknown                        | 36              | 38.7 |
| Prior Radiotherapy             |                 |      |
| No                             | 29              | 31.2 |
| Yes                            | 28              | 30.1 |
| Unknown                        | 36              | 38.7 |

## Preclinical evaluation of PRC2-targeting agents in NPC

**Table S2.** Clinical outcome of the 93 patients with archival NPC tumors analyzed in this study

|                                                   | Frequency | %    |
|---------------------------------------------------|-----------|------|
| Status                                            |           |      |
| Alive                                             | 52        | 55.9 |
| Died of NPC                                       | 27        | 29.0 |
| Died after protocol treatment complication        | 8         | 8.6  |
| Died of other chemotherapy treatment complication | 2         | 2.2  |
| Died of concurrent illness                        | 2         | 2.2  |
| Died of other causes                              | 2         | 2.2  |
| Progression                                       |           |      |
| Without progression                               | 64        | 68.8 |
| Local failure                                     | 15        | 16.1 |
| Regional failure                                  | 5         | 5.4  |
| Distant failure                                   | 17        | 18.3 |

Note: 3 cases have both local-regional failure and distant failure. 29 cases have distant or local-regional failure.

**Table S3.** Survival analysis of EZH2, EED, SUZ12 and H3K27me3

|                                | Hazard Ratio (HR) | 95% CI      | P value |
|--------------------------------|-------------------|-------------|---------|
| OS                             |                   |             |         |
| EZH2 expression level          | 0.803             | 0.381-1.695 | 0.565   |
| SUZ12 expression level         | 0.815             | 0.387-1.718 | 0.591   |
| EED expression level           | 0.902             | 0.319-2.552 | 0.846   |
| Primary tumor (T) stage        | 0.372             | 0.186-0.741 | 0.005   |
| Regional lymph nodes (N) stage | 0.409             | 0.215-0.776 | 0.006   |
| Overall stage                  | 0.278             | 0.115-0.672 | 0.004   |
| PFS                            |                   |             |         |
| EZH2 expression level          | 0.812             | 0.399-1.652 | 0.566   |
| SUZ12 expression level         | 0.838             | 0.413-1.701 | 0.624   |
| EED expression level           | 0.787             | 0.280-2.209 | 0.649   |
| Primary tumor (T) stage        | 0.529             | 0.282-0.990 | 0.047   |
| Regional lymph nodes (N) stage | 0.425             | 0.231-0.781 | 0.006   |
| Overall stage                  | 3.310             | 1.454-7.535 | 0.004   |
| DMFS                           |                   |             |         |
| EZH2 expression level          | 1.321             | 0.431-4.052 | 0.626   |
| SUZ12 expression level         | 0.849             | 0.277-2.605 | 0.775   |
| EED expression level           | 0.429             | 0.057-3.233 | 0.411   |
| LRFS                           |                   |             |         |
| EZH2 expression level          | 0.703             | 0.285-1.733 | 0.444   |
| SUZ12 expression level         | 0.707             | 0.287-1.737 | 0.449   |
| EED expression level           | 0.573             | 0.135-2.421 | 0.448   |

Note: 0 and +1 were classified as negative group; +2 and +3 were classified as positive group.

## Preclinical evaluation of PRC2-targeting agents in NPC

**Table S4.** Correlation of markers with NPC stage

|                          | EZH2     |          | P value |
|--------------------------|----------|----------|---------|
|                          | Negative | Positive |         |
| Distant-metastatic stage |          |          | 1.000   |
| Without Metastatic       | 25       | 62       |         |
| Metastatic               | 1        | 5        |         |
| Primary tumor (T)        |          |          | 0.021   |
| T1 + T2                  | 8        | 38       |         |
| T3 + T4                  | 18       | 28       |         |
| Overall stage            |          |          | 0.121   |
| Stage I + Stage II       | 5        | 24       |         |
| Stage III + Stage IV     | 21       | 43       |         |
| Local failure            |          |          | 0.771   |
| Without local failure    | 22       | 54       |         |
| Local failure            | 4        | 13       |         |
|                          | SUZ12    |          | P value |
|                          | Negative | Positive |         |
| Distant-metastatic stage |          |          | 1.000   |
| Without Metastatic       | 23       | 64       |         |
| Metastatic               | 1        | 5        |         |
| Primary tumor (T)        |          |          | 0.058   |
| T1 + T2                  | 8        | 38       |         |
| T3 + T4                  | 16       | 30       |         |
| Overall stage            |          |          | 0.204   |
| Stage I + Stage II       | 5        | 24       |         |
| Stage III + Stage IV     | 19       | 45       |         |
| Local Failure            |          |          | 1.000   |
| Without local failure    | 20       | 56       |         |
| Local failure            | 4        | 13       |         |
|                          | EED      |          | P value |
|                          | Negative | Positive |         |
| Metastatic stage         |          |          | 0.541   |
| Without Metastatic       | 10       | 77       |         |
| Metastatic               | 1        | 5        |         |
| Primary tumor (T)        |          |          | 0.197   |
| T1 + T2                  | 3        | 43       |         |
| T3 + T4                  | 8        | 38       |         |
| Overall stage            |          |          | 0.163   |
| Stage II                 | 1        | 28       |         |
| Stage III + Stage IV     | 10       | 54       |         |
| Local Failure            |          |          | 0.682   |
| Without local failure    | 10       | 66       |         |
| Local failure            | 1        | 16       |         |
|                          | H3K27me3 |          | P value |
|                          | Negative | Positive |         |
| Metastatic stage         |          |          | 1.000   |
| Without Metastatic       | 23       | 64       |         |
| Metastatic               | 1        | 5        |         |
| Primary tumor (T)        |          |          | 0.342   |
| T1 + T2                  | 10       | 36       |         |

## Preclinical evaluation of PRC2-targeting agents in NPC

|                       |    |    |       |
|-----------------------|----|----|-------|
| T3 + T4               | 14 | 32 |       |
| Overall stage         |    |    | 0.448 |
| Stage II              | 6  | 23 |       |
| Stage III + Stage IV  | 18 | 46 |       |
| Local Failure         |    |    | 0.707 |
| Without local failure | 19 | 57 |       |
| Local failure         | 5  | 12 |       |

**Table S5.** Frequency table of prognostic markers

| Prognostic marker | No. of patients | %     |
|-------------------|-----------------|-------|
| <b>EZH2</b>       |                 |       |
| 0 = none          | 11              | 11.83 |
| +1 = weak         | 15              | 16.13 |
| +2 = moderate     | 22              | 23.66 |
| +3 = strong       | 45              | 48.39 |
| <b>SUZ12</b>      |                 |       |
| 0 = none          | 14              | 15.05 |
| +1 = weak         | 10              | 10.75 |
| +2 = moderate     | 27              | 29.03 |
| +3 = strong       | 42              | 45.16 |
| <b>EED</b>        |                 |       |
| 0 = none          | 3               | 3.23  |
| +1 = weak         | 8               | 8.60  |
| +2 = moderate     | 36              | 38.71 |
| +3 = strong       | 46              | 49.46 |
| <b>H3K27me3</b>   |                 |       |
| 0 = none          | 18              | 19.35 |
| +1 = weak         | 6               | 6.45  |
| +2 = moderate     | 20              | 21.51 |
| +3 = strong       | 49              | 52.69 |

**Table S6.** Spearman correlation analysis result among 4 biomarkers

|          | EZH2    | SUZ12   | EED    | H3K27me3 |
|----------|---------|---------|--------|----------|
| EZH2     | /       | 0.476** | 0.263* | 0.409**  |
| SUZ12    | 0.476** | /       | 0.256* | 0.191    |
| EED      | 0.263*  | 0.256*  | /      | 0.225*   |
| H3K27me3 | 0.409** | 0.191   | 0.225* | /        |

Note: Table shows r values. \*means P < 0.05; \*\*means P < 0.000.

# Preclinical evaluation of PRC2-targeting agents in NPC

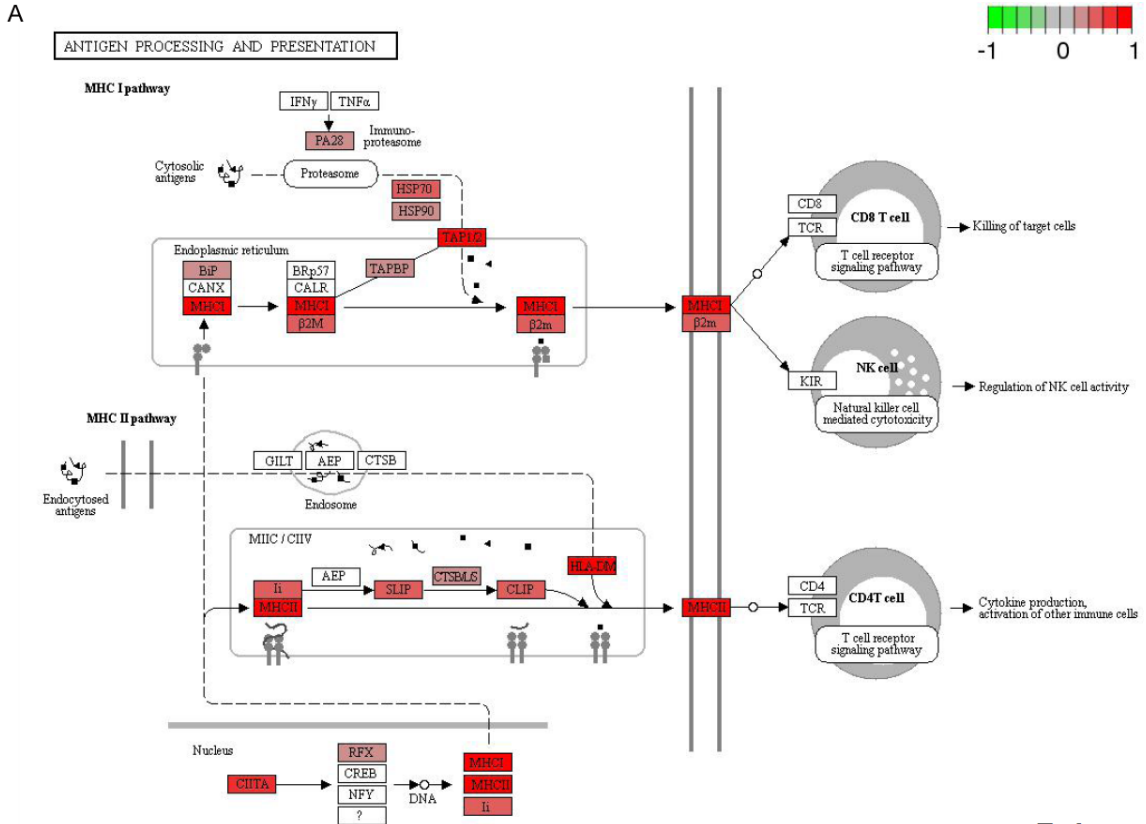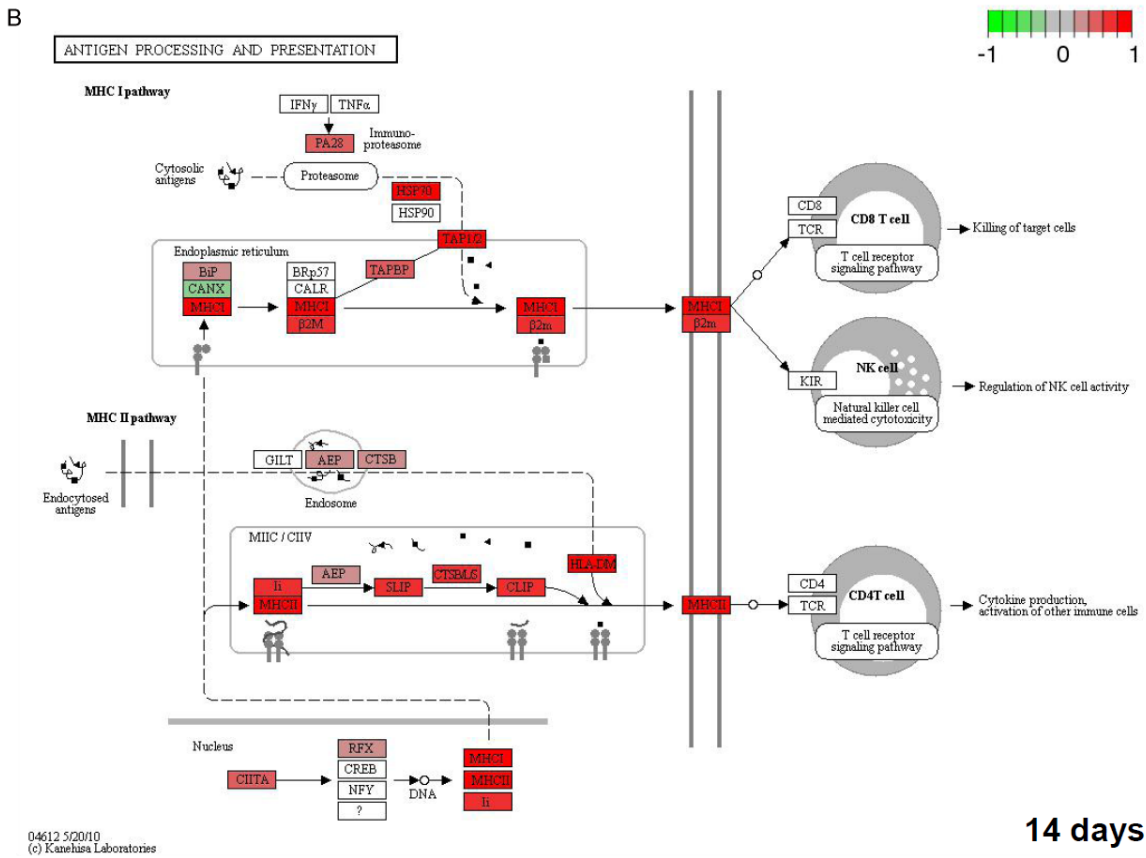

Preclinical evaluation of PRC2-targeting agents in NPC

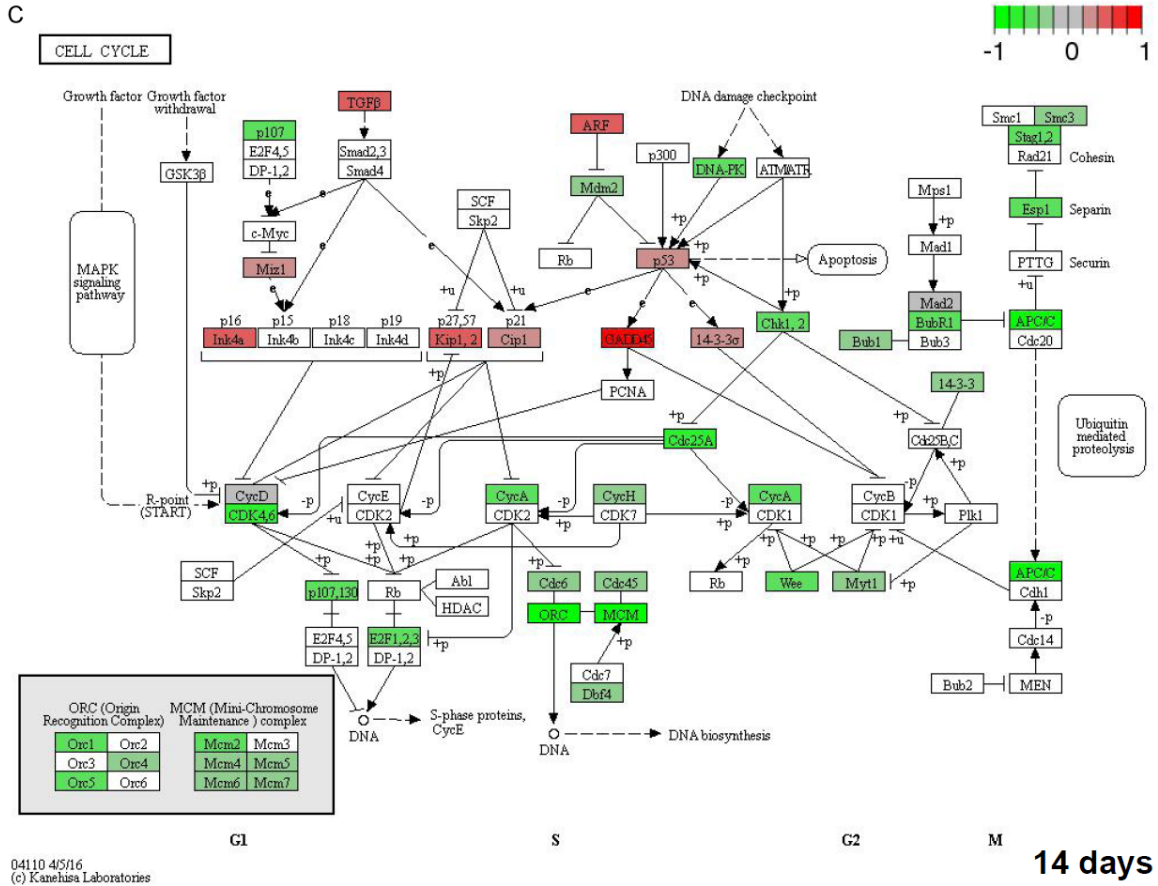

**Figure S1.** KEGG pathway enrichment analysis. KEGG analysis of antigen processing and presentation pathway (ID: hsa04612) at 7 (A) and 14 (B) day. *MHC-1*, *TAP1/2*, *B2M*, *MHC-II*, *HLA-DM*, *HSP70*, *SLIP* and *CLIP* are red indicated those genes were up regulated after the treatment of EED226. (C) KEGG analysis of cell cycle (ID: hsa04110) at 14 days. *CDK4/6* are green indicated those genes were down regulated after the treatment of EED226.
